# Supplementary material for: Effect of a multidisciplinary Severe Immunotherapy Complications Service on outcomes for patients receiving immune checkpoint inhibitor therapy for cancer
Source: PubMed Central journal article supplement — J Immunother Cancer. 2021 Sep 20;9(9):e002886. doi: 10.1136/jitc-2021-002886 (PMC8454442; doi:10.1136/jitc-2021-002886), 2021-09-20
Supplement: jitc-2021-002886supp001.pdf [file jitc-2021-002886supp001.pdf]

**Supplemental Table 1. Impact of SIC Service Implementation on Key Outcomes – Logistic Regressions Analyzed by First Admission**

| Outcome                                    | Pre-SIC <sup>a</sup>                | Post-SIC <sup>b</sup>               | Coefficient / OR<br>(95% CI) <sup>c</sup> | P Value |
|--------------------------------------------|-------------------------------------|-------------------------------------|-------------------------------------------|---------|
|                                            | (n = 127 1 <sup>st</sup><br>admits) | (n = 122 1 <sup>st</sup><br>admits) |                                           |         |
| Length of stay, median (IQR), days         | 5 (3-9)                             | 5 (3-8)                             | -0.24 (-1.77-1.29) <sup>d</sup>           | 0.758   |
| Discharged on corticosteroids <sup>e</sup> | 87 (71.9%)                          | 74 (64.4%)                          | 0.61 (0.32-1.18) <sup>f</sup>             | 0.141   |
| Use of non-steroidal immunosuppression     | 14 (11.0%)                          | 10 (8.2%)                           | 0.93 (0.38-2.31) <sup>f</sup>             | 0.878   |
| ICI discontinuation for irAE <sup>g</sup>  | 58 (64.4%)                          | 54 (68.4%)                          | 1.25 (0.62-2.53) <sup>f</sup>             | 0.526   |
| Died during irAE admission                 | 8 (6.3%)                            | 11 (9.0%)                           | 1.58 (0.60-4.24) <sup>f</sup>             | 0.361   |

Abbreviations: SIC, Severe Immunotherapy Complications; OR, odds ratio; CI, confidence interval; IQR, interquartile range.

<sup>a</sup> Data are presented as number (percentage) of first admissions, unless otherwise indicated; Pre-SIC date range is 4/2/2016 – 10/2/2017.

<sup>b</sup> Data are presented as number (percentage) of first admissions, unless otherwise indicated; Post-SIC date range is 10/3/2017 – 10/24/2018.

<sup>c</sup> Data are presented as coefficient (95% CI) for linear regressions (continuous variables) and odds ratio (95% CI) for logistic regressions (categorical variables).

<sup>d</sup> Multivariable linear regression with covariates: age, sex, irAE confirmation status, malignancy, ICI class, and primary toxicity type.

<sup>e</sup> Excludes patients with thyroid toxicities or diabetes mellitus (given steroids are not indicated) as the irAE. Pre-SIC *n* = 160. Post-SIC *n* = 139.

<sup>f</sup> Multivariable logistic regression with covariates: age, sex, irAE confirmation status, malignancy, ICI class, primary toxicity type, and presence of multiple toxicities.

<sup>g</sup> Excludes patients with endocrine toxicities (given ICI discontinuation is not indicated) as well as patients who previously discontinued ICI prior to admission or discontinued ICI for any non-irAE reason (disease progression).
